# Supplementary material
Source: Springer Nature journal article supplement (https://www.springermedizin.de/resource/supplementary/12889_2012_3874_MOESM2_ESM.pdf/9490904)

Work-related questionnaire sent to the employee's home

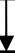

Auditory tests in the audiological clinic

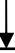

Interview conducted by the psychologist/ social worker and OP of the team

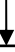

Multidisciplinary team established an interdisciplinary profile of the employee and explained to the employee

Workplace visit if indicated

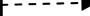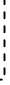

Written report with recommendations and advices (management plan)

Report discussed by telephone with the OP of the team and the OP on site

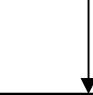

GP

OP on site

EMP

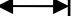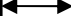

Implementation of recommendations and advices

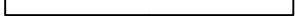

Supplement: MOESM2 [file 9490904]
